# Supplementary material
Source: ML conference proceedings conference paper supplement (https://openaccess.thecvf.com/content/cvpr_2016/html/Quan_Equiangular_Kernel_Dictionary_2016_CVPR_paper.html)
Supplement: Supplementary file 1 [file Quan_Equiangular_Kernel_Dictionary_2016_CVPR_supplemental.pdf]

## Supplementary Materials

### 1. Proof of Proposition 3.1

Without loss of generality, we may assume  $\|D_i\| = 1$  for all  $i$ . From the definition of  $\Phi$ , we know

$$\|\Phi(D_i)\|_2^2 = \langle \Phi(D_i), \Phi(D_i) \rangle = \psi(0), \forall i,$$

and

$$\langle \Phi(D_i), \Phi(D_j) \rangle = \psi(2 - 2\mu_0), \forall i \neq j.$$

We complete the proof by noting  $c_0 = \sqrt{\psi(0)}$  and  $\eta = \psi(2 - 2\mu_0)$ .

### 2. Proof of Proposition 3.5

Since  $H(C, D) = \frac{1}{2}\text{Tr}(C^\top QC - 2K(D, Y)^\top C)$  and  $k(x, y) = \exp(-\|x - y\|_2^2/2\sigma^2)$ , we have

$$\begin{aligned} \nabla_C H(C, D) &= QC - K(D, Y), \\ \nabla_{D_\ell} H(C, D) &= \sum_{i=1}^n a_{\ell i} (D_\ell - Y_i), \forall \ell, \end{aligned} \quad (1)$$

where  $a_{\ell i} = -\frac{1}{\sigma^2} C_{\ell i} \exp\left(-\frac{\|D_\ell - Y_i\|_2^2}{2\sigma^2}\right)$ .

As  $\nabla_C^2 H(C, D) = Q$  implies that  $\nabla_C H(C, D)$  is Lipschitz with modulus  $\lambda_{\max}(Q)$ , where  $\lambda_{\max}(Q)$  is the maximal eigenvalue of  $Q$ . Moreover, the Hessian matrix  $\nabla_{D_\ell}^2 H(C, D)$  is given by

$$\sum_{i=1}^n a_{\ell i} \left(I - \frac{1}{\sigma^2} (D_\ell - Y_i)(D_\ell - Y_i)^\top\right).$$

By the fact  $(1 - \|y\|_2^2)^2 \leq \|d - y\|_2^2 \leq (1 + \|y\|_2^2)^2$  for any  $\|d\|_2 = 1$ , we have  $|a_{\ell i}| \leq \frac{1}{\sigma^2} |C_{\ell i}| \exp\left(-\frac{(1 - \|Y_i\|_2^2)}{2\sigma^2}\right)$  and the maximal eigenvalue is bounded by  $1 + \frac{1}{\sigma^2} \|D_\ell - Y_i\|_2^2 \leq 1 + \frac{1}{\sigma^2} (1 + \|Y_i\|_2^2)^2$ . Thus, the maximal eigenvalue of  $\nabla_{D_\ell}^2 H(C, D)$  is bounded by  $L(C_\ell)$  which is defined as

$$\sum_{i=1}^n \frac{1}{\sigma^2} |C_{\ell i}| \exp\left(-\frac{1 + \|Y_i\|_2^2}{2\sigma^2}\right) (1 + \frac{1}{\sigma^2} (1 + \|Y_i\|_2^2)^2). \quad (2)$$

### 3. Numerical Algorithm for The Supervised Equiangular Kernel Sparse Coding Problem (16)

Recall that the supervised extension of our equiangular kernel dictionary learning method is formulated as the fol-

lowing minimization model:

$$\begin{aligned} \min_{D \in \mathcal{D}, C \in \mathcal{C}, W} & \frac{1}{2} \text{Tr}(C^\top QC - 2K(D, Y)^\top C) \\ & + \frac{\beta}{2} \|L - WC\|_F^2 + \frac{\alpha}{2} \|W\|_F^2, \end{aligned} \quad (3)$$

where  $\mathcal{C} = \{C : \|C\|_\infty \leq M, \|C_z\|_0 \leq T, \forall z\}$  and  $\mathcal{D} = \{D : D^\top D = DD^\top = I\}$ . We give the detailed algorithm for solving (3) as follows. Define

$$\begin{aligned} H(C, D, W) &= \frac{1}{2} \text{Tr}(C^\top QC - 2K(Y, D)^\top C) + \frac{\beta}{2} \|L - WC\|_F^2, \\ F(C) &= \delta_{\mathcal{C}}(C), G(D) = \delta_{\mathcal{D}}(D), E(W) = \frac{\alpha}{2} \|W\|_F^2. \end{aligned}$$

Then the sparse code  $C$ , dictionary  $D$  and classifier  $W$  are updated by the following proximal alternating scheme.

**1. Kernel sparse coding.** When the dictionary  $D$  and the classifier  $W$  are fixed, we update the sparse code  $C$  via solving:

$$C^{j+1} \in \underset{C}{\text{argmin}} F(C) + \frac{s^j}{2} \|C - U^j\|_F^2, \quad (4)$$

where  $U^j = C^j - \nabla_C H(C^j, D^j, W^j)/s^j$  and  $s^j$  is some positive step size. This subproblem has a closed-form solution given by

$$C^{j+1} = \text{sign}(U^j) \odot \underset{C}{\text{argmin}} (H_T(|U^j|), M), \quad (5)$$

where  $H_T(X)$  keeps the largest  $T$  entries in each column of  $X$  and sets others to zero.

**2. Dictionary update.** When the sparse code  $C$  and the classifier  $W$  are fixed, the update of dictionary  $D$  is the same as that in the unsupervised version, *i.e.* we update the dictionary  $D$  by solving

$$D^{j+1} \in \underset{D}{\text{argmin}} G(D) + \frac{t^j}{2} \|D - V^j\|_F^2, \quad (6)$$

where  $V^j = D^j - \nabla_D H(C^{j+1}, D^j, W^j)/t^j$  and  $t^j$  is some positive step size. This problem (6) has a closed-form solution given by the Proposition. 3.4 in our paper.

**3. Classifier update.** When the dictionary  $D$  and sparse code  $C$  are fixed, we update  $W$  via solving the following minimization:

$$\underset{W}{\text{argmin}} \frac{\beta}{2} \|L - WC^j\|_F^2 + \frac{\alpha}{2} \|W\|_F^2 + \frac{\nu^j}{2} \|W - W^j\|_F^2, \quad (7)$$

where  $p^j > 0$ . The solution of (7) is given by

$$W^{j+1} = (\beta LC^{j\top} + p^j W^j)(\beta C^j C^{j\top} + (\alpha + p^j)I)^{-1}. \quad (8)$$

**Setting of step size.** The three step sizes  $p^j$ ,  $s^j$ ,  $t^j$  are set as follows. Since  $\|W\|_F^2$  has coercive property, we know  $W^j$  is a bounded sequence and the maximal eigenvalue of  $Q + W^{j\top} W^j$  is defined by  $\lambda_{max}^j$  and  $\lambda_{max} = \max_j(\lambda_{max}^j)$ .

Given  $\gamma_j > 1$ ,  $0 < a < b$  and  $0 < c < d$  such that  $b > \lambda_{max}$  for all  $j$  and  $d > L_{max}$ , where  $L_{max} = \max\{L(C_\ell) : \ell = 1, 2, \dots, m, C \in \mathcal{C}\}$  and  $L(C_\ell)$  is defined in (2).

$$s^j = \max(\min(\gamma_j \lambda_{max}^j, b), a), \quad (9a)$$

$$t^j = \max(\min(\gamma_j L(C^{j+1}), d), c), \quad (9b)$$

$$p^j \in [p_{min}, p_{max}], \quad (9c)$$

where  $L(C^{j+1}) = \max(\{L(C_\ell^{j+1}), \ell = 1, 2, \dots, m\})$  and  $p_{min}, p_{max}$  are two positive numbers.

**Convergence analysis.** We can easily extend the convergence result of Alg. 1 to the supervised version by checking the conditions in the proof of Theorem 3.7. The proof is omitted here.

#### 4. Algorithm for Solving Problem (17)

The minimization problem (17) is equivalent to

$$\min_X \text{Tr}(X^\top A X - B^\top X), \quad (10)$$

subject to  $\|X\|_0 \leq T$ , where  $A = K(D, D)$  and  $B = K(D, Y)$ . We use proximal gradient descent method to solve (10). More specifically, we update  $X$  via

$$X^{j+1} = \text{sign}(\hat{X}^j) \odot H_T(|\hat{X}^j|), \quad (11)$$

where  $\hat{X}^j = X^j - (AX^j - B)/v$  and  $H_T$  is defined in (5). The step size  $v$  is set as  $v > \lambda(A)$  where  $\lambda(A)$  is the maximal eigenvalue of  $A$ .

#### 5. Details of The Global Feature Extraction

Given the sparse code  $C \in \mathcal{R}^{m \times n \times t \times k}$  of a DT sequence  $g \in \mathcal{R}^{m \times n \times t}$ , we use  $C_{(i)} = C(:, :, :, i) \in \mathcal{R}^{m \times n \times t}$  to denote the sparse code that corresponds to the  $i$ th dictionary atom  $D_i$ . As the sparse code is extracted by a sliding window,  $C_{(i)}$  can be viewed as a sequence whose size is the same as the original DT sequence. Then, we extract a histogram  $h_{(i)}^A \in \mathcal{R}^{l_0 \times 1}$  on  $C_{(i)}$  w.r.t. code value. Moreover, we extract three mean histograms along X, Y, and T axes, which are denoted by  $h_{(i)}^X, h_{(i)}^Y, h_{(i)}^T \in \mathcal{R}^{l_1 \times 1}$  respectively. Take the X-axis case for example. We cut  $C_{(i)}$  into slices along the X axis, and compute a histogram w.r.t. code value on each slice. These histograms are averaged to be the mean histogram for the X axis. See Fig. 1 for an illustration of such a process. Define  $h_{(i)} = [h_{(i)}^A; h_{(i)}^X; h_{(i)}^Y; h_{(i)}^T]$ . The final feature vector for  $g$  is the concatenation of  $h_{(i)}$  over  $i$ .

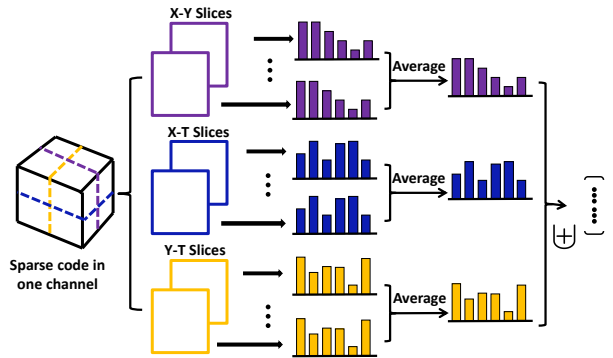

Figure 1. Calculation of space-time histograms in one coding channel.
